# Supplementary material for: Discovery of Amide-Functionalized Benzimidazolium Salts as Potent α-Glucosidase Inhibitors
Source: MDPI journal article supplement (doi:10.3390/molecules26164760), 2021-08-06
Supplement: s1 [file s1]

# Discovery of amide-functionalized benzimidazolium salts as potent $\alpha$ -glucosidase Inhibitors

Imran Ahmad Khan <sup>1</sup>, Matloob Ahmad <sup>1,\*</sup>, Usman Ali Ashfaq <sup>2</sup>, Sadia Sultan <sup>3,4,\*</sup> and Magdi E. A. Zaki <sup>5,\*</sup>

## Characterization Data of Potent Compounds

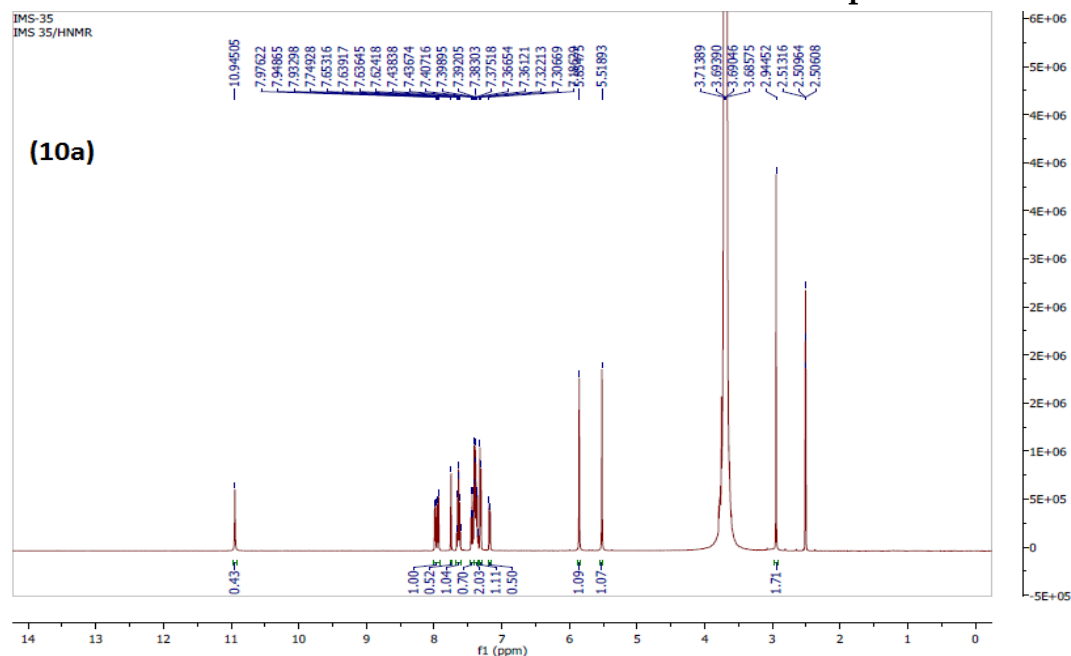

Figure S1. <sup>1</sup>H NMR Spectra of compound 10a

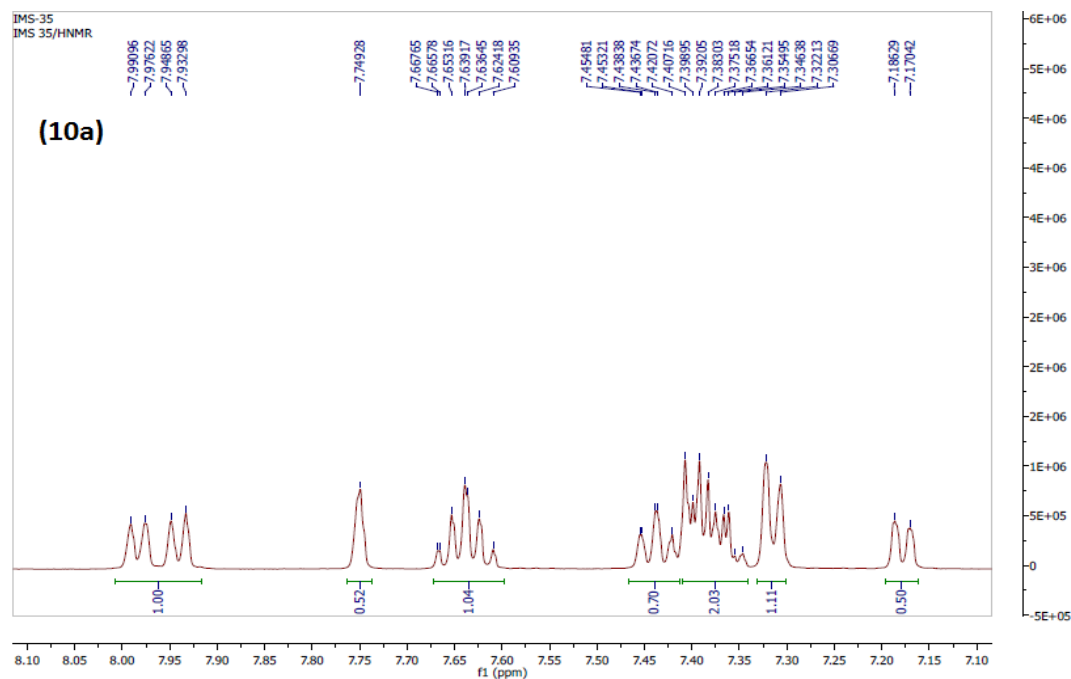

Figure S1a. Expanded version of <sup>1</sup>H NMR Spectra of compound 10a

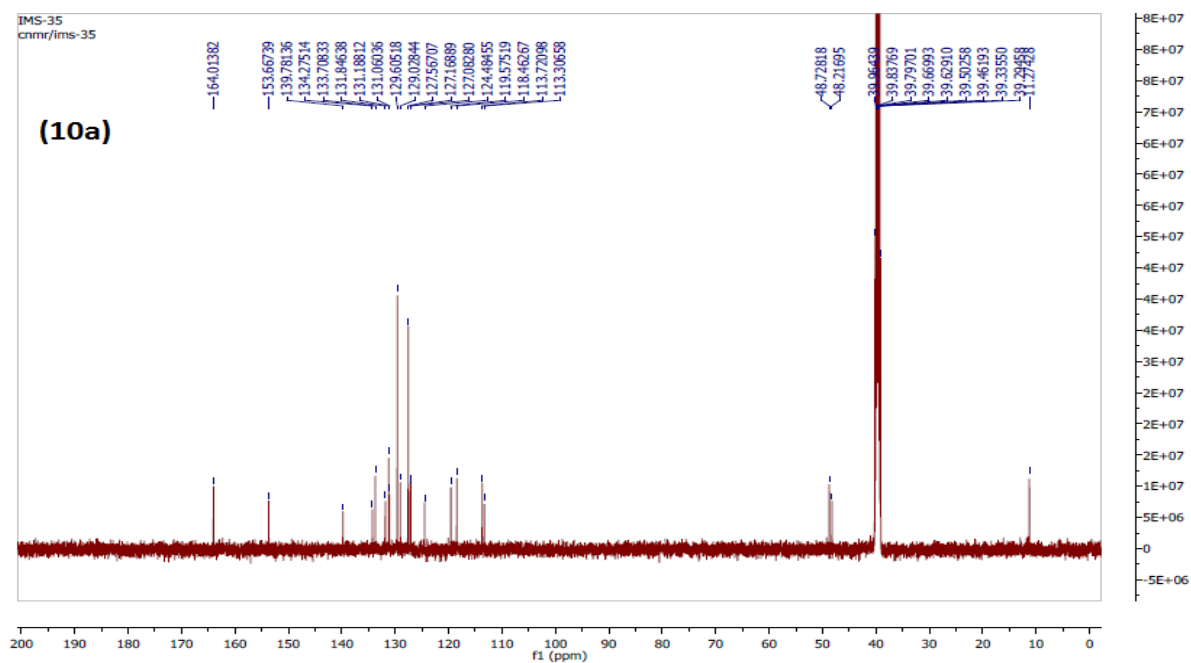

**Figure S2.**  $^{13}\text{C}$  NMR Spectra of compound **10a**

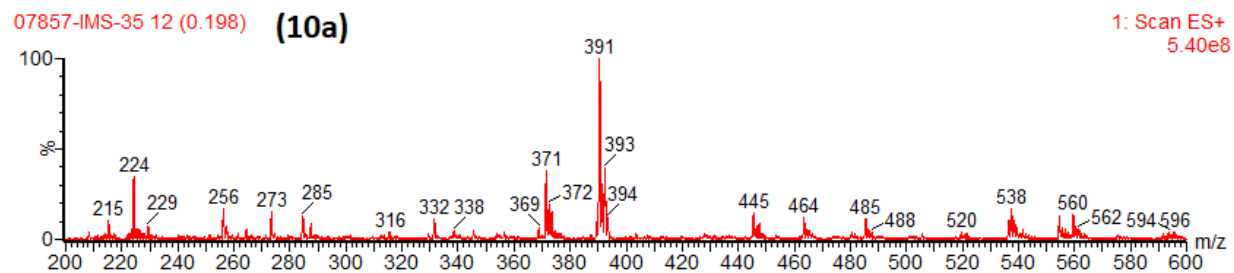

**Figure S3.** MS (ESI+) Spectra of compound **10a**

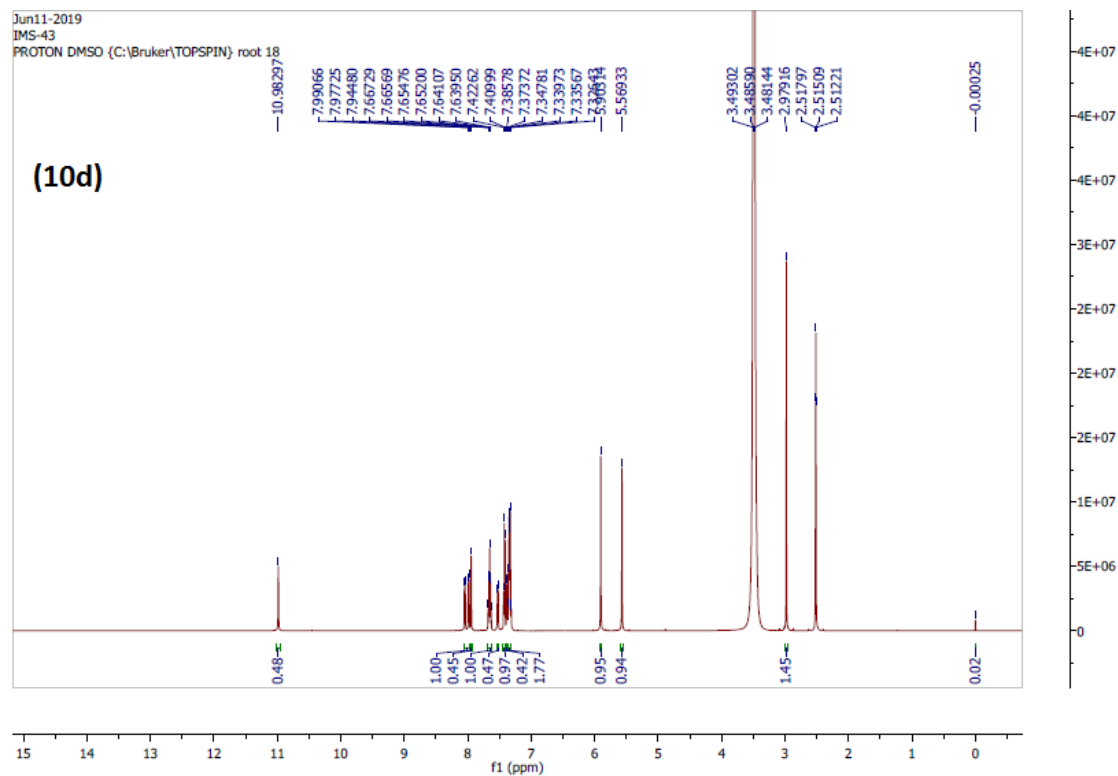

**Figure S4.**  $^1\text{H}$  NMR Spectra of compound **10d**

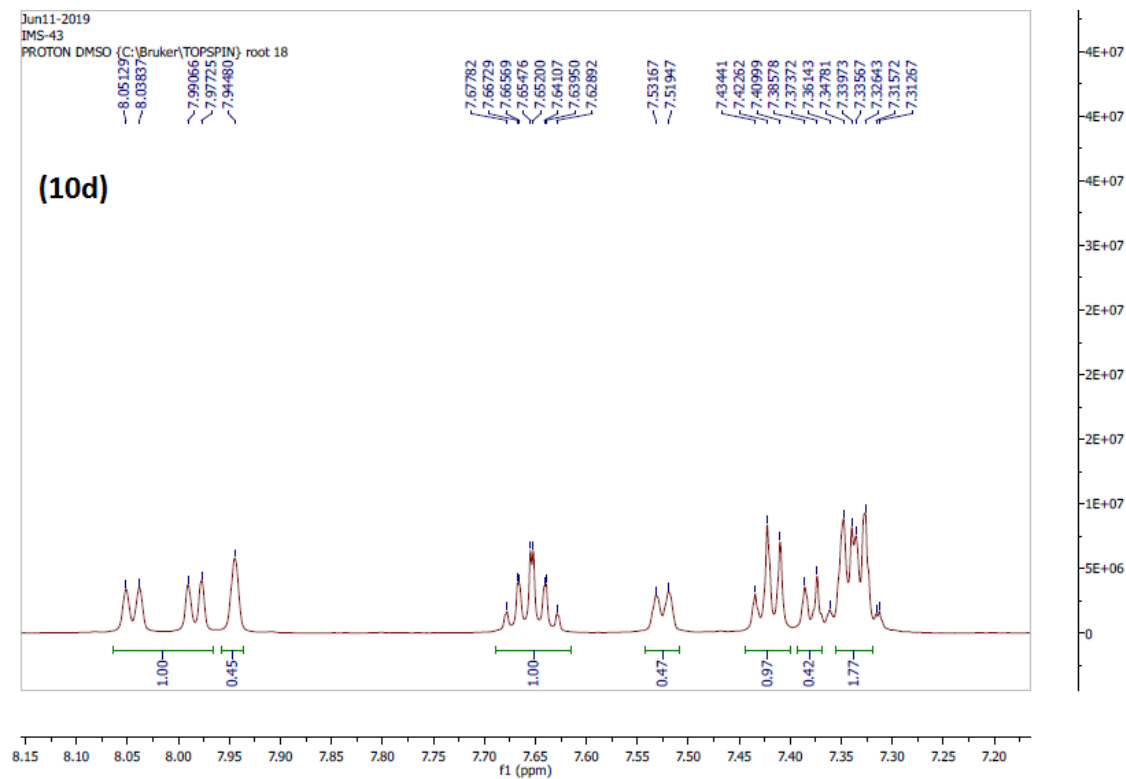

**Figure S4a.** Expanded version of  $^1\text{H}$  NMR Spectra of compound **10d**

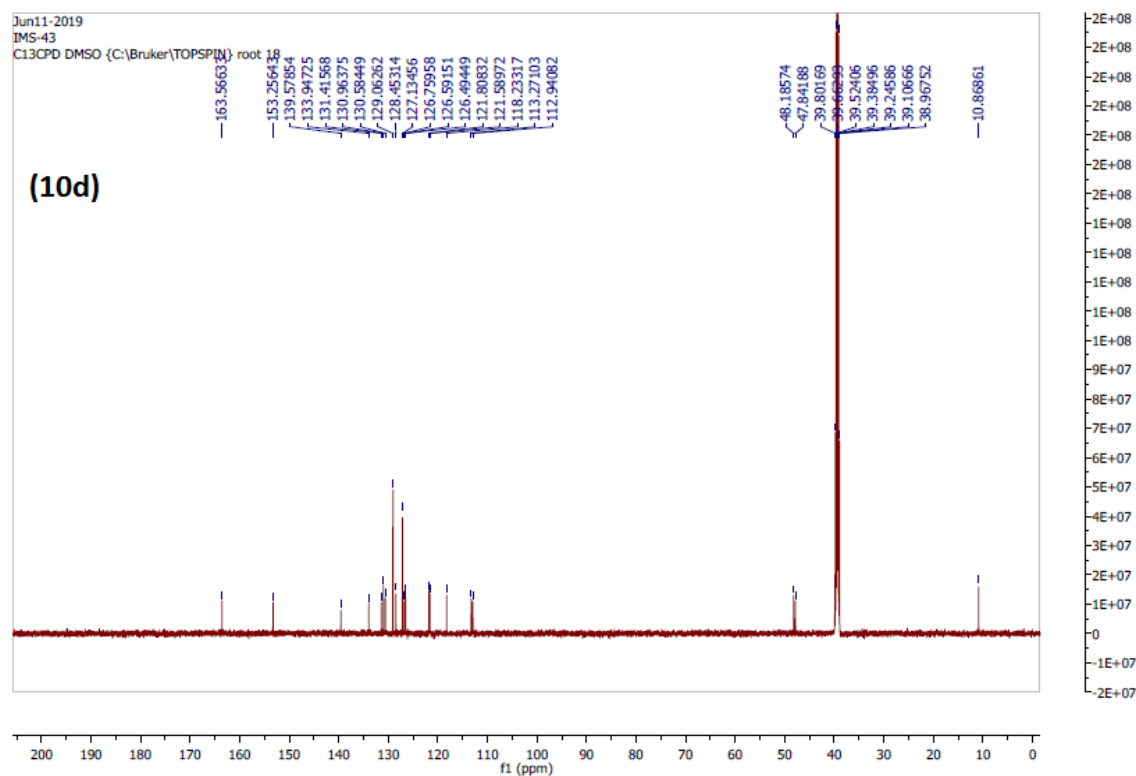

Figure S5.  $^{13}\text{C}$  NMR Spectra of compound **10d**

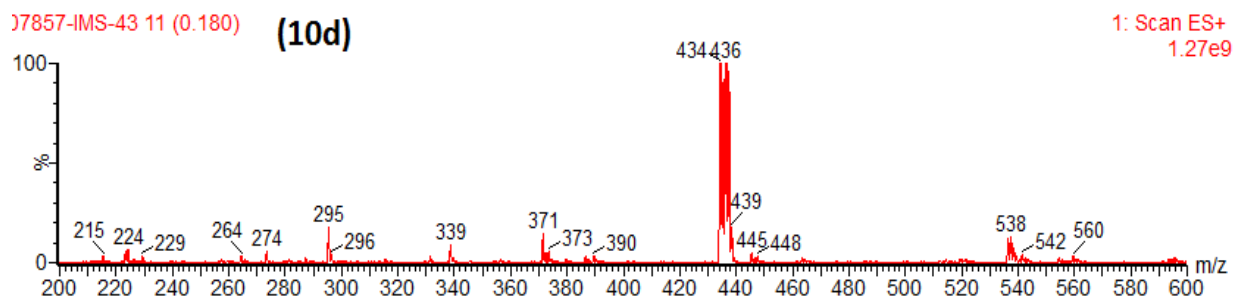

Figure S6. MS (ESI+) Spectra of compound **10d**



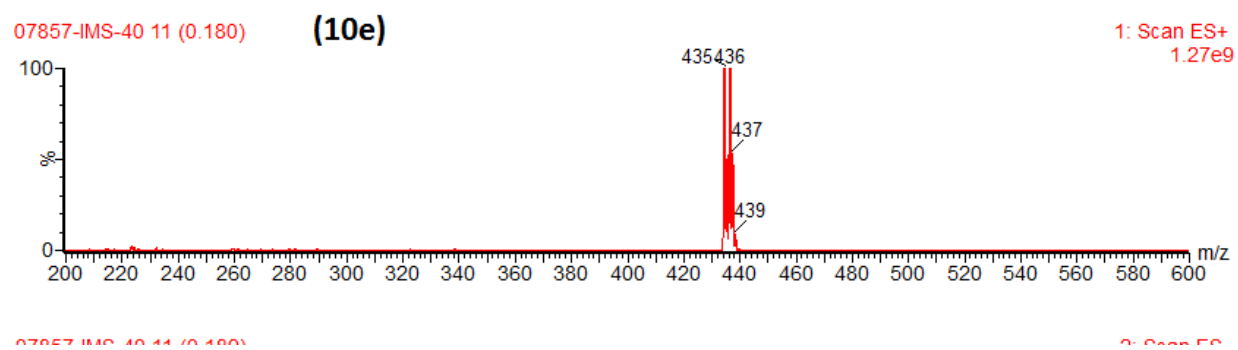

**Figure S8.** MS (ESI+) Spectra of compound **10e**

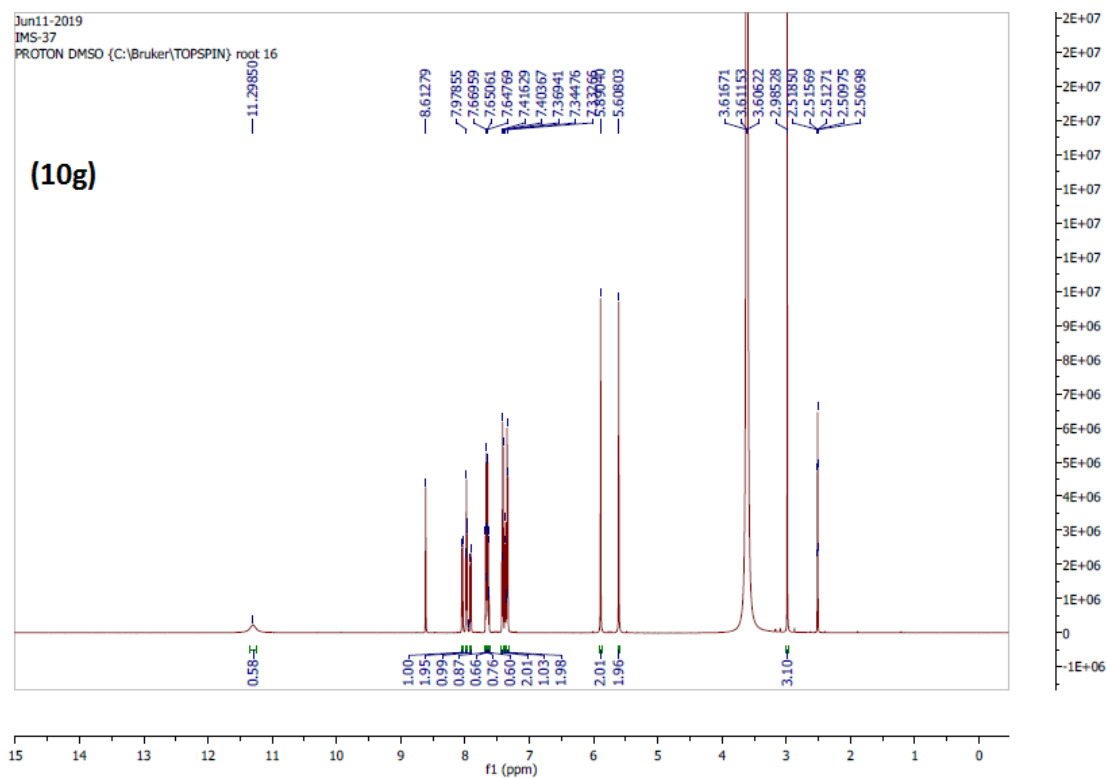

**Figure S9.**  $^1\text{H}$  NMR Spectra of compound **10g**

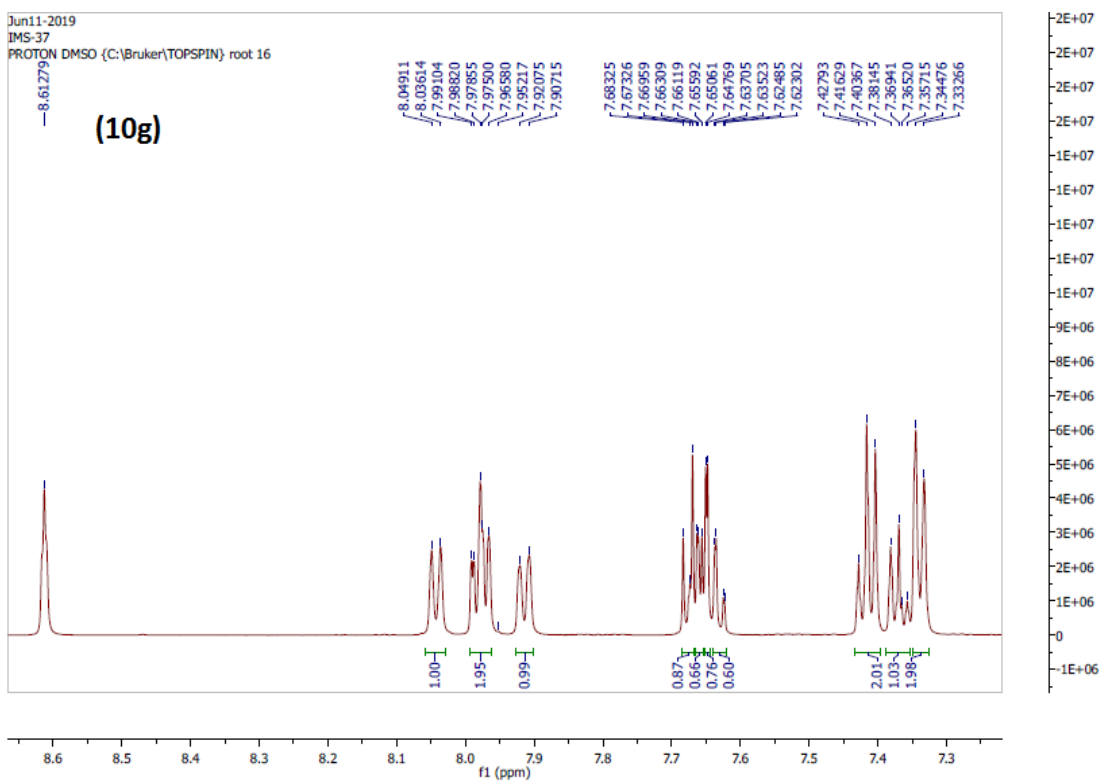

**Figure S9a.** Expanded version of  $^1\text{H}$  NMR Spectra of compound **10g**

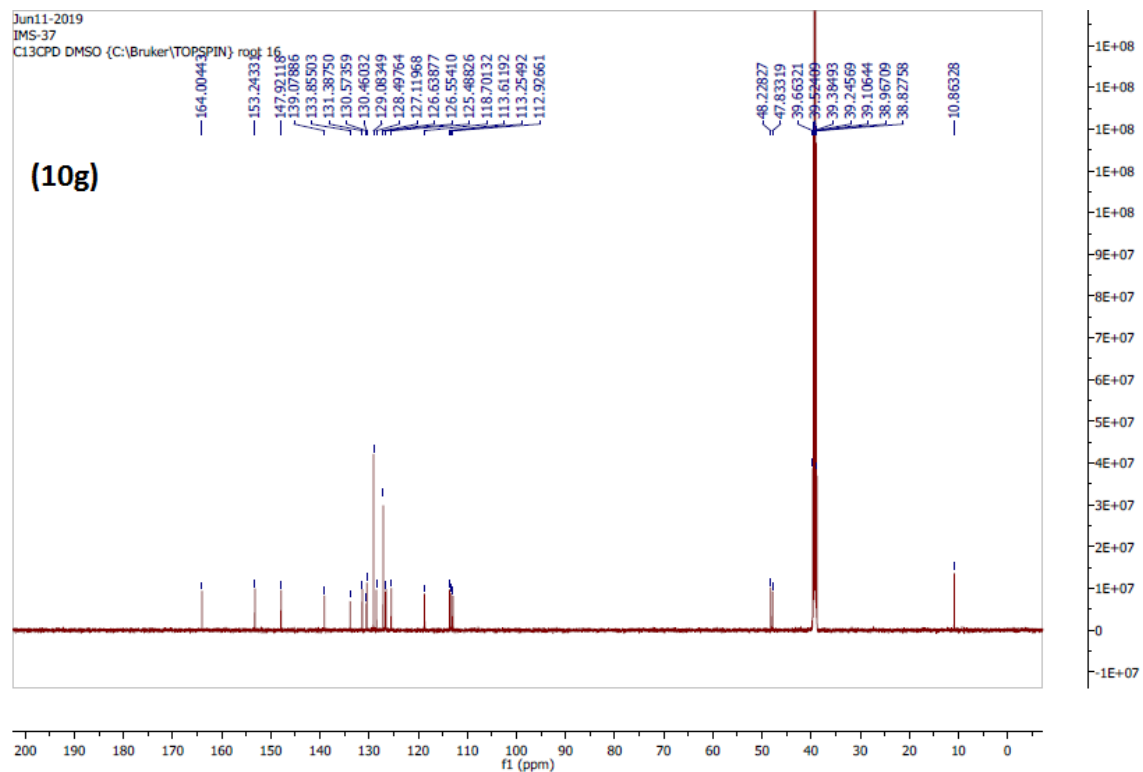

**Figure S10.**  $^{13}\text{C}$  NMR Spectra of compound **10g**

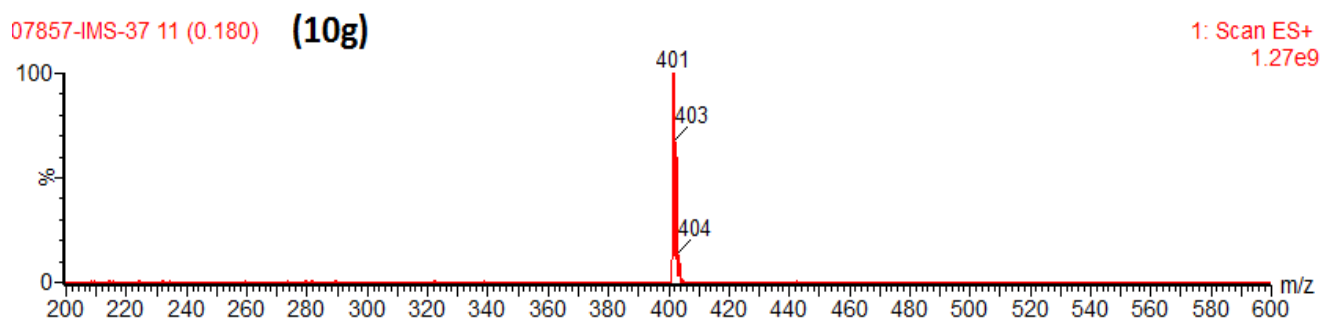

**Figure S11.** MS (ESI+) Spectra of compound **10g**



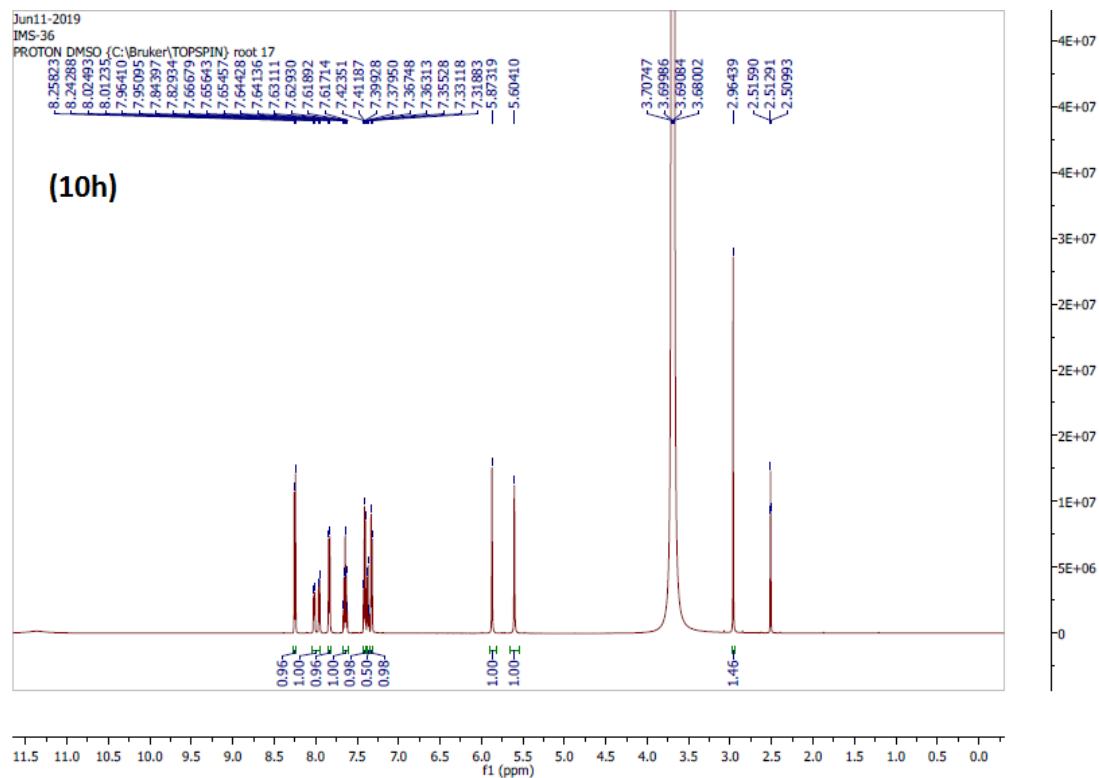

Figure S12.  $^1\text{H}$  NMR Spectra of compound 10h

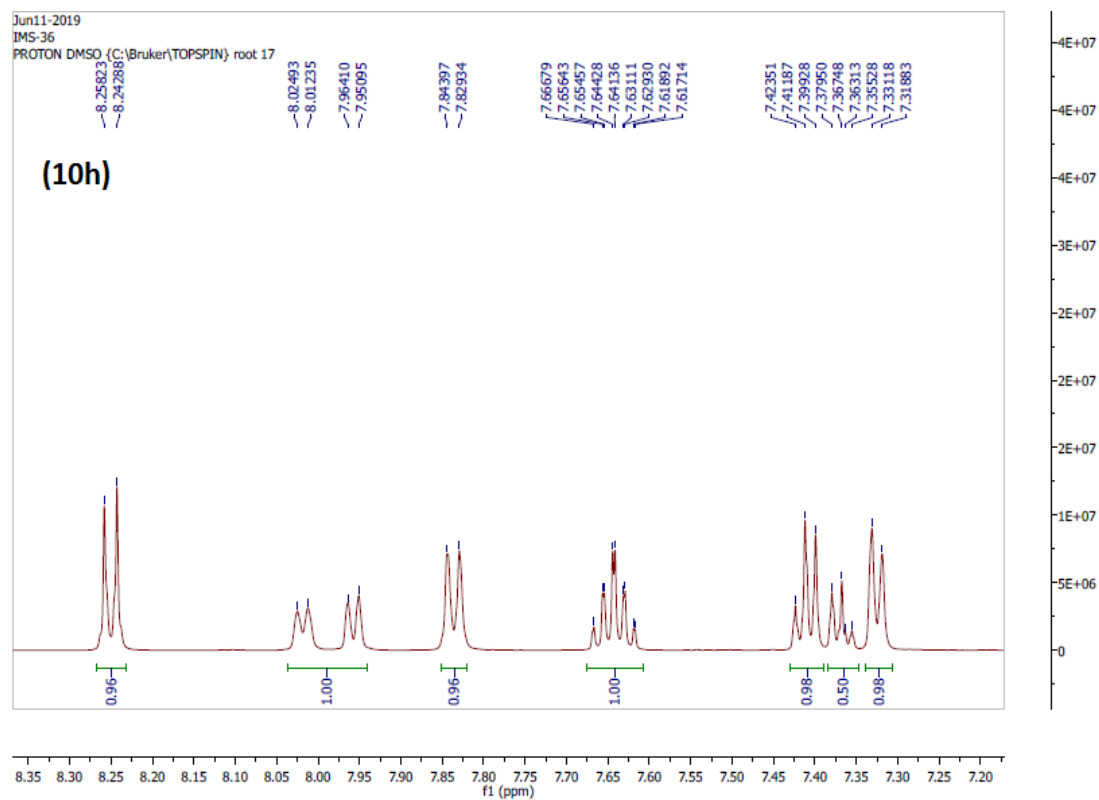

Figure S12a. Expanded version of  $^1\text{H}$  NMR Spectra of compound 10h

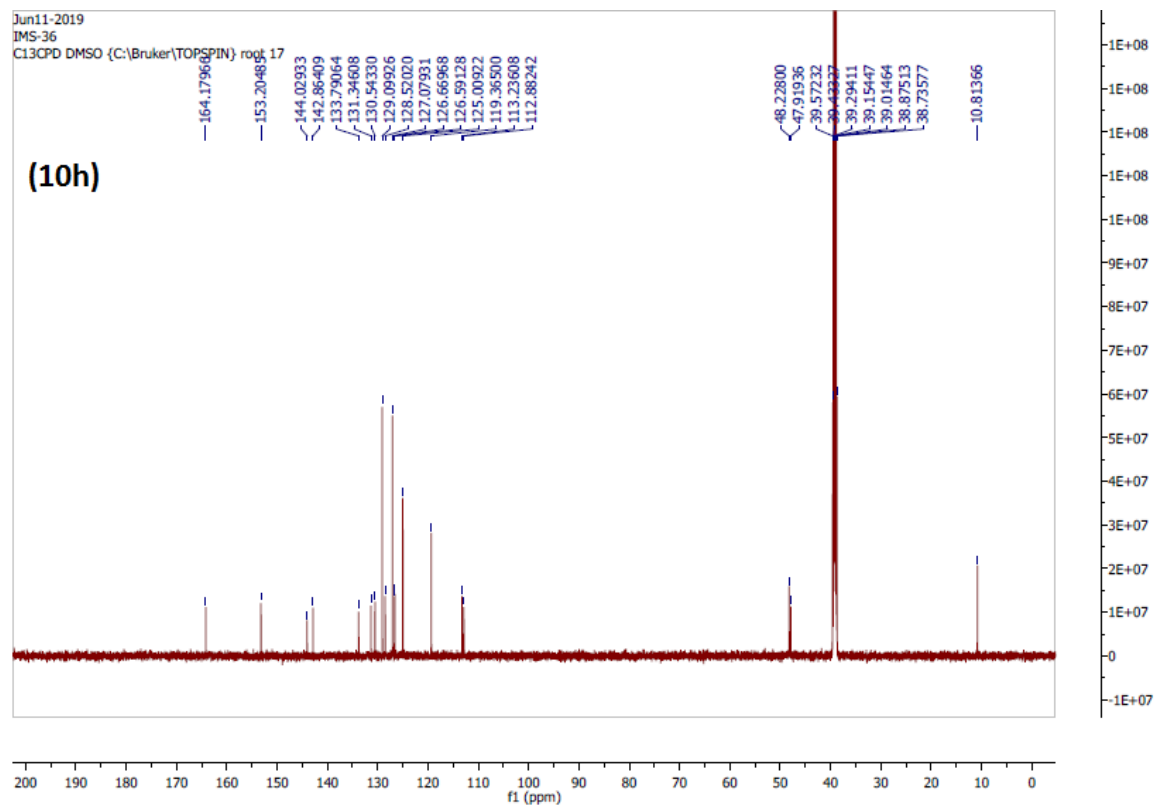

**Figure S13.**  $^{13}\text{C}$  NMR Spectra of compound **10h**

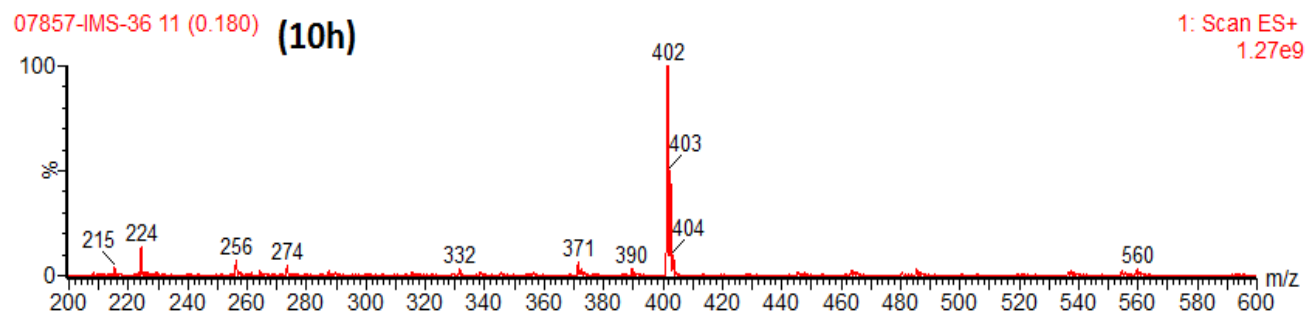

**Figure S14.** MS (ESI+) Spectra of compound **10h**

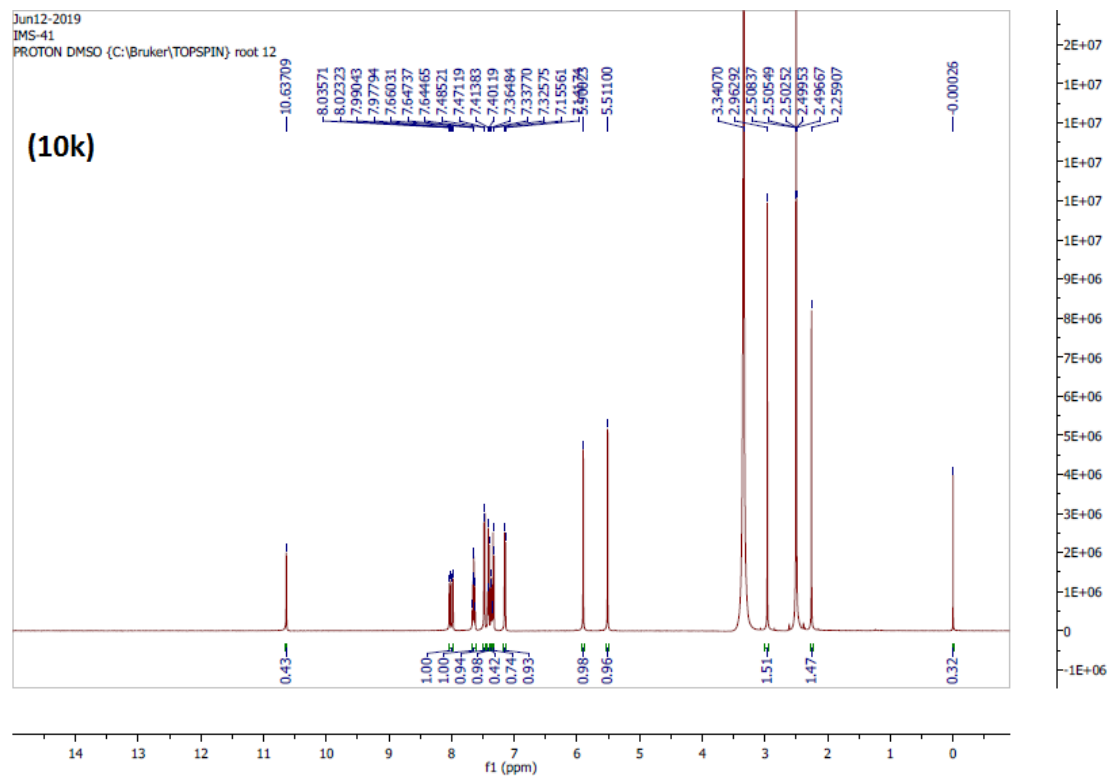

Figure S15.  $^1\text{H}$  NMR Spectra of compound **10k**

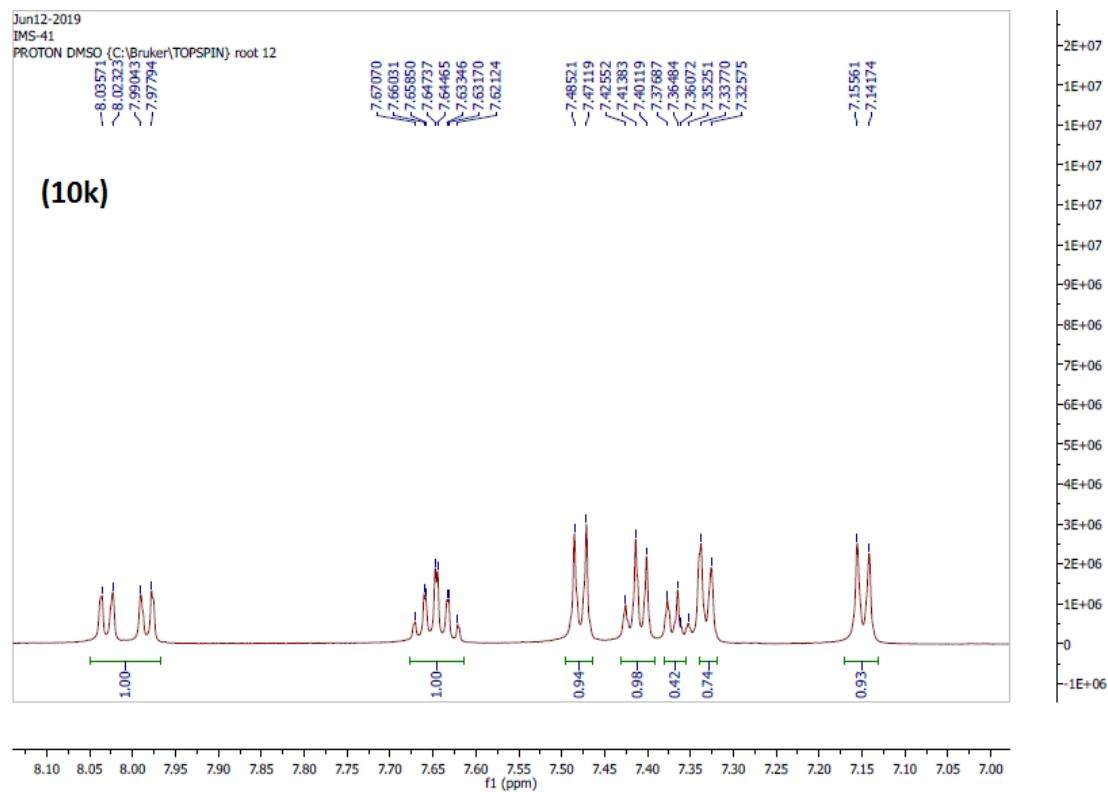

Figure S15a. Expanded version of  $^1\text{H}$  NMR Spectra of compound **10k**

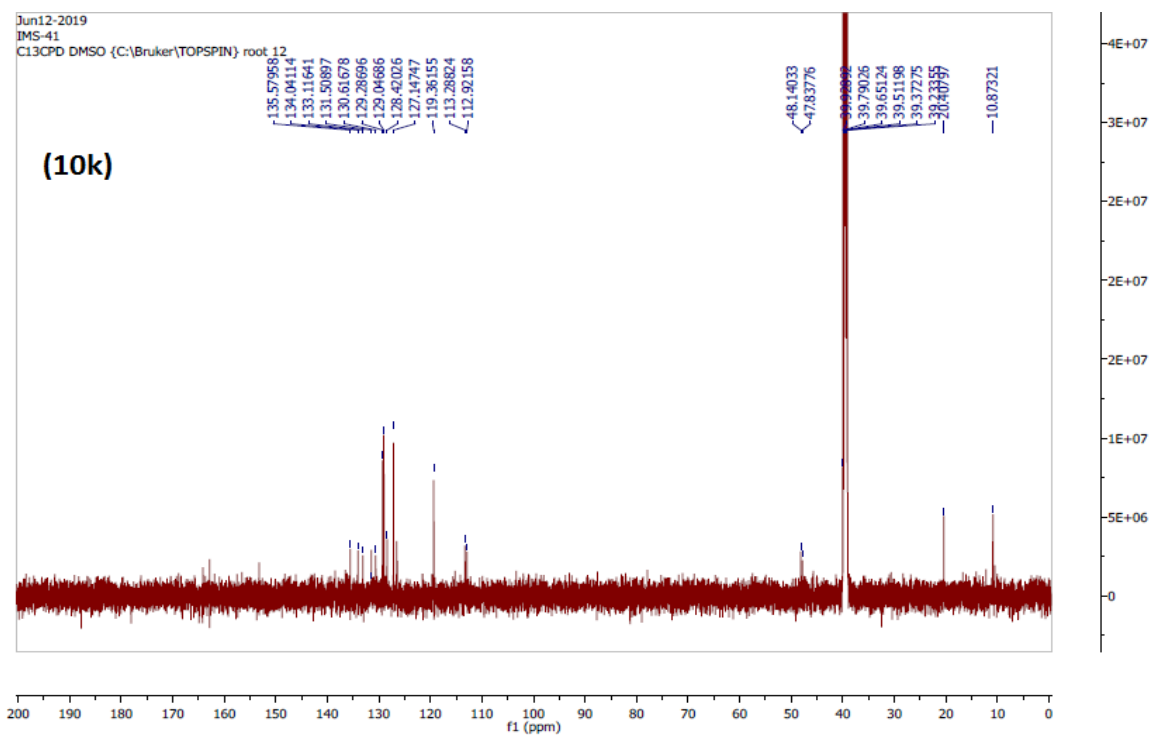

Figure S16.  $^{13}\text{C}$  NMR Spectra of compound **10k**

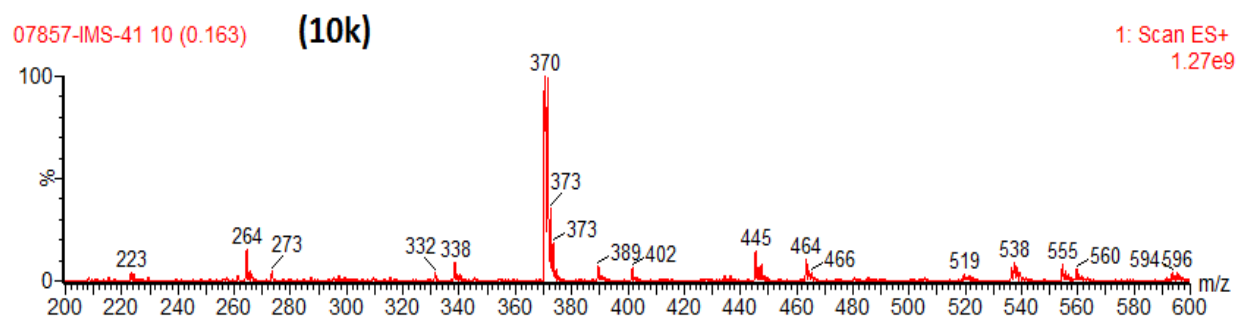

Figure S17. MS (ESI+) Spectra of compound **10k**

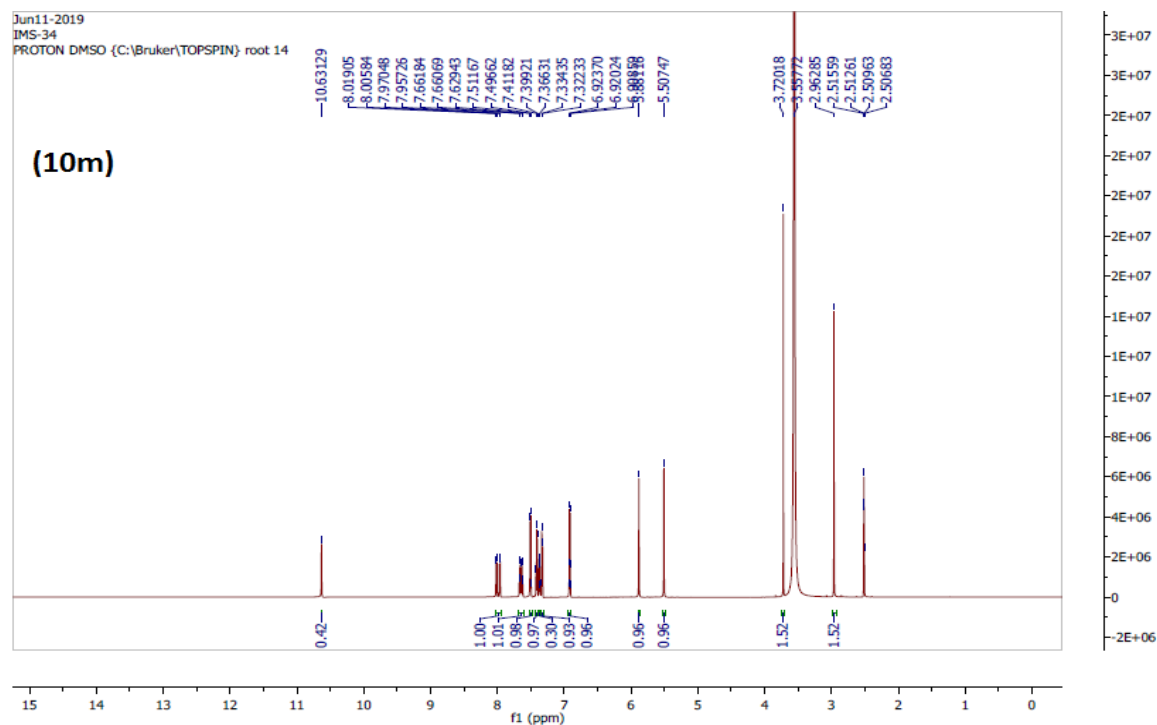

Figure S18.  $^1\text{H}$  NMR Spectra of compound **10m**

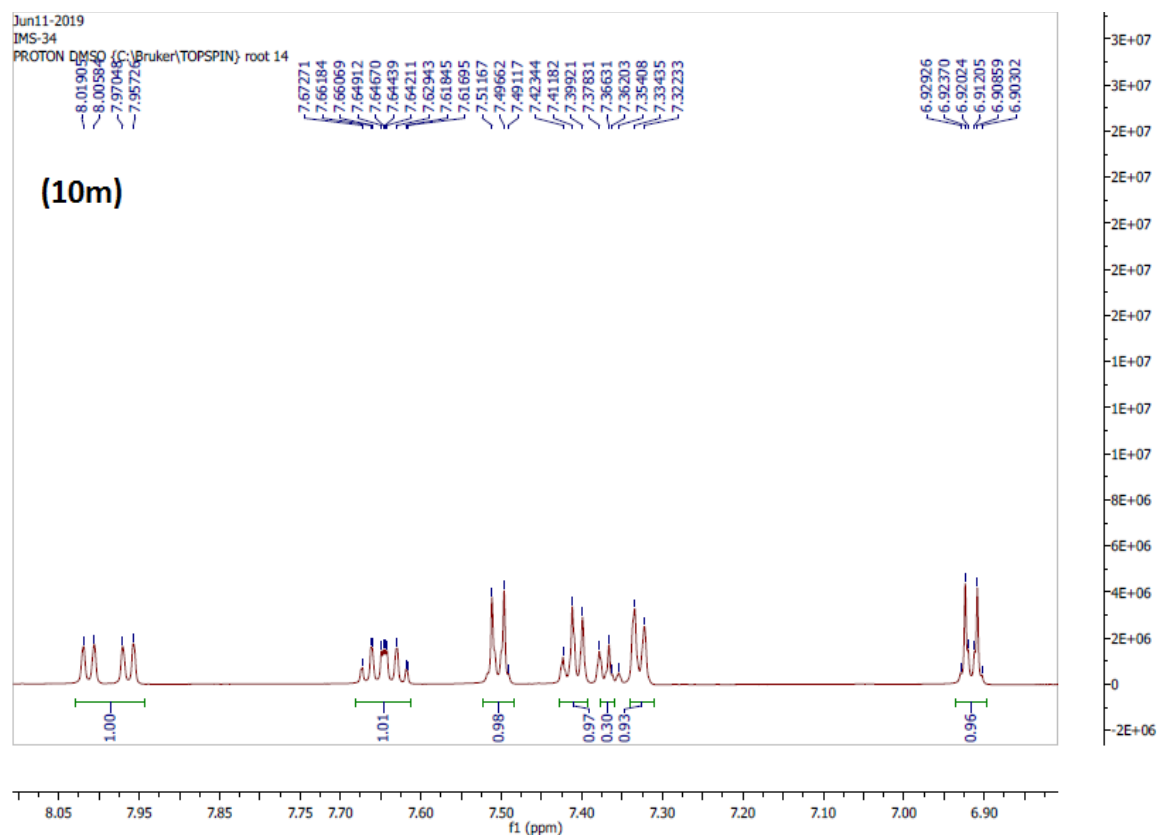

Figure S18a. Expanded version of  $^1\text{H}$  NMR Spectra of compound **10m**

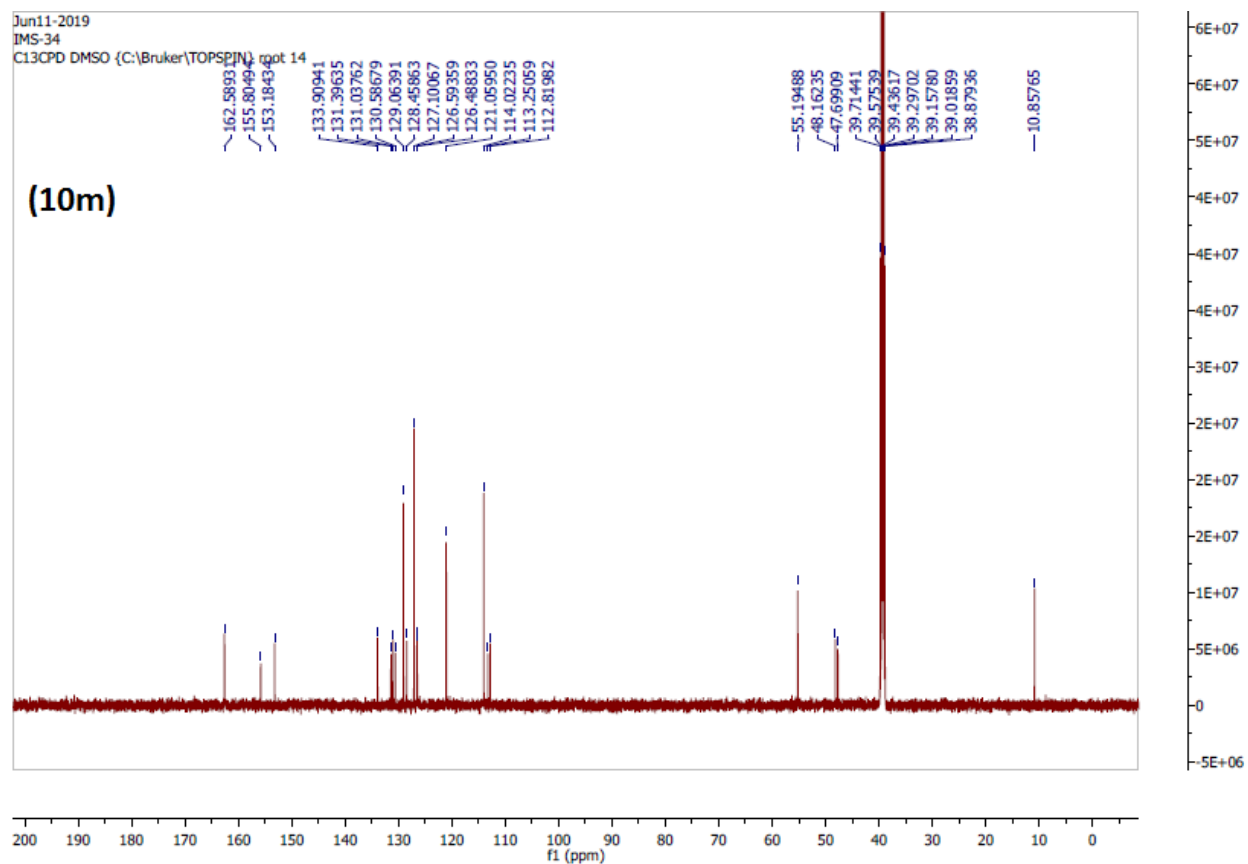

**Figure S19.**  $^{13}\text{C}$  NMR Spectra of compound **10m**

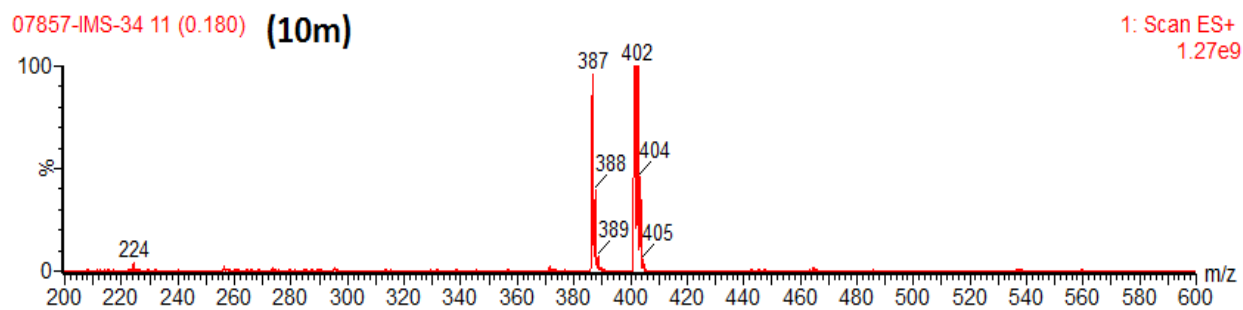

**Figure S20.** MS (ESI+) Spectra of compound **10m**
